# Supplementary material for: Evaluation of first-principles Hubbard and Hund corrected DFT for defect formation energies in non-magnetic transition metal oxides
Source: Royal Society of Chemistry journal article supplement (doi:10.1039/d4ra07774a), 2024-01-01
Supplement: d4ra07774a1.zip [file d4ra07774a1.zip]

## Sheet: Previous work
	Example calcs:
			O vacancy	charge	E_defect	E_perf	μ_O	VBM E	form E	Charge correction	form E final
	0	1.2352	Vacancy site O1	0	-1289.5	-1296.09	-5.3553	3.3809	1.2352	0	1.2352
	1	1.23414	charge +1	1	-1292.87	-1296.09	-5.3553	3.3809	1.2386	-0.0044591	1.23414
	2	1.73266	charge +2	2	-1295.74	-1296.09	-5.3553	3.3809	1.7505	-0.0178366	1.73266
			Silicon substitional	charge	E_defect	E_perf	μ_SiO2	μ_1/2O2	μ_Mo	VBM E	formation E	Charge correction
	0	0	Charge 0	0	-1294.27	-1296.09	-23.1415	-5.3553	-10.9375	3.3809	3.31556	0
	-1	0	Charge -1:	-1	-1290.77	-1296.09	-23.1415	-5.3553	-10.9375	3.3809	3.42936	0
	-2	0	Charge -2:	-2	-1286.98	-1296.09	-23.1415	-5.3553	-10.9375	3.3809	3.83506	0
			Intersitial silicon:		E_defect	E_perf	μ_SiO2	μ_1/2O2	VBM E	formation E	Charge correction	corrected E
	0	2.03555	Intersitial site 1	0	-1306.48	-1296.09	-23.1415	-5.3553	2.7	2.03555	0	2.03555
	-1	2.6506	charge -1	-1	-1302.48	-1296.09	-23.1415	-5.3553	3.3809	2.65505	-0.0044591	2.6506
	-2	3.45692	charge -2	-2	-1298.28	-1296.09	-23.1415	-5.3553	3.3809	3.47475	-0.0178366	3.45692
	1	1.709	charge+1	1	-1310.19	-1296.09	-23.1415	-5.3553	3.3809	1.71345	-0.0044591	1.709
	2	1.79062	charge+2	2	-1313.47	-1296.09	-23.1415	-5.3553	3.3809	1.80845	-0.0178366	1.79062
	3	2.38302	charge+3	3	-1316.24	-1296.09	-23.1415	-5.3553	3.3809	2.42315	-0.0401323	2.38302
	4	2.54481	charge+4	4	-1319.43	-1296.09	-23.1415	-5.3553	3.3809	2.61615	-0.0713464	2.54481
	-3	4.77621	charge-3	-3	-1294.53	-1296.09	-23.1415	-5.3553	3.3809	3.84755	0.928654	4.77621
			O interstitial 3
					E_defect	E_perf	μ_O	VBM E	form E	Charge correction	form E final
	0	2.6806	charge0	0	-1298.76	-1296.09	-5.3553	3.3809	2.6806	0	2.6806
	-1	3.34425	charge-1	-1	-1294.71	-1296.09	-5.3553	3.3809	3.3487	-0.0044591	3.34425
	-2	3.99547	charge-2	-2	-1290.67	-1296.09	-5.3553	3.3809	4.0133	-0.0178366	3.99547
	Chem potential:
	T (K)	po2/po20	T0	So2 (eV/K)	cp (eV/K)	Δμ(T)	kb (eV/K)	pressure term	μMoO3	μMo(s)	ΔGfMoO3	μ(1/2)O2 (g)
	273.15	1	273.15	0.0021	0.000302	0	8.61733e-05	0	-27.0012	-10.9353	-6.9239	-3.04734
	0.01	1	273.15	0.0021	0.000302	0.24556	8.61733e-05	0	-27.0012	-10.9353	-6.9239	-2.80178
	1000	1	273.15	0.0021	0.000302	-0.738542	8.61733e-05	0	-27.0012	-10.9353	-6.9239	-3.78588
	273.15	10	273.15	0.0021	0.000302	0	8.61733e-05	0.0117691	-27.0012	-10.9353	-6.9239	-3.03557
	273.15	0.05	273.15	0.0021	0.000302	0	8.61733e-05	-0.015312	-27.0012	-10.9353	-6.9239	-3.06265
	1000	0.005	273.15	0.0021	0.000302	-0.738542	8.61733e-05	-0.0991437	-27.0012	-10.9353	-6.9239	-3.88502
	273.15	0.2	273.15	0.0021	0.000302	0	8.61733e-05	-0.00822626	-27.0012	-10.9353	-6.9239	-3.05556
		Mo solid		O solid			Mo solid		O solid
		-3.70034		-5.45899			-10.5056		3.50185
		oxygen poor	mu high	oxygen rich			oxygen poor	mu high	oxygen rich
	O	1.23345		-5.45899		O	3.50185		3.50185
	Mo	-3.70034		16.377		Mo	-10.5056		-10.5056
		charge	energy		energy per electron
	Pure	0	-1296.09	-1296.09				-1296.09
	pure +1	1	-1298.82	-1298.82	-1298.82			0
	pure +2	2	-1301.46	-1301.46	-650.729			0
	pure +3	3	-1304	-1304	-434.668			0
	pure +4	4	-1306.48	-1306.48	-326.619			0
	pure+10	10	-1320.51	-1320.51	-132.051			0
	pure -0.1	-0.1	-1295.69	-1295.69	12956.9			0
	pure-1	-1	-1292.06	-1292.06	1292.06			0
	pure-2	-2	-1288.05	-1288.05	644.023			0
	pure-5 unf	-5	-1275.4	-1275.4	255.08			0
					μMoO3	μMo(s)	ΔGfMoO3	μ(1/2)O2 (g)
				-0.25	-27.0012	-10.9353	-7.66956	-3.04878
					Mo solid		O solid
					-10.9353		-3.04878
					oxygen poor	mu high	oxygen rich
				O	-5.3553		-3.04878		2.30652
				Mo	-10.9353		-17.8549		-6.91956

## Sheet: TiO2rawresults
	Pure cell:
								13.6057			PBE		gap
		TIO2									Evbm	8.7053	1.8346
											Ecbm	10.5399
	PBE					UJ
		Total energy (ryd)		per form			Total energy (ryd)		per form		UJ
	223k222	-4438.55	-60389.6	-1887.17		223k222	-4409.68	-59996.8	-1874.9		Evbm	7.4236	gap
											Ecbm	10.216	2.7924
	O-RICH ( Initial)
	charge	Edefect	E_defect	E_perf	μ_O	VBM E	form E	Charge correction	form E (VBM)	form E (CBM)
PBE		ryd	eV						0	1.8346	2.7924
ch0	0	-4406.01	-59946.8	-60389.6	-438.891	8.7053	3.87587	0	3.87587	3.87587	3.87587
ch2	2	-4407.52	-59967.4	-60389.6	-438.891	8.7053	0.688781	0	0.688781	4.35798	6.27358
Chg transition:						transition	1.59354		0.241056
			-19.0041
UJ									0	2.7924
ch0	0	-4377.62	-59560.6	-59996.8	-432.537	7.4236	3.6407	0	3.6407	3.6407		-10.2988
ch2	2	-4379.08	-59580.5	-59996.8	-432.537	7.4236	-1.40492	0	-1.40492	4.17988
Chg transition:				-2499.87		transition	2.52281		0.269586
	O-poor (Titania)
	charge	Edefect	E_defect	E_perf	μ_O	VBM E	form E	Charge correction	form E (VBM)	form E (CBM)
PBE		ryd	eV						0	1.8346	2.7924
ch0	0	-4406.01	-59946.8	-60389.6	-443.5	8.7	-0.733152	0	-0.733152	-0.733152	-0.733152
ch2	2	-4407.52	-59967.4	-60389.6	-443.5	8.7	-3.93084	0	-3.93084	-0.26164	1.65396
Chg transition:						transition	1.59884		0.235756
			-18.9988
UJ									0	2.7924
ch0	0	-4377.62	-59560.6	-59996.8	-437.146	7.4236	-0.968318	0	-0.968318	-0.968318
ch2	2	-4379.08	-59580.5	-59996.8	-437.146	7.4236	-6.01395	0	-6.01395	-0.429147
								Ouj 4fold		-504.334	11.8355		-31.5209	0.739722
								OUJ 3 fold		-503.3	12.8594		-31.4563	0.803714
							UJ calc						UJ calc
							using crystal reference with no Ti UJ						Using crystal reference with Ti UJ
Chemical potentials:		Ti (crystal) energy :		per form unit:			Ti (crystal) energy :		per form unit:				Ti (crystal) energy :		per form unit:
PBE		-359.239	-4887.7	-1629.23			-359.239	-4887.7	-1629.23		0		-358.432	-4876.72	-1625.57			3.65879
		TiO2 sim:		per form unit:			TiO2 sim:		per form unit:				TiO2 sim:		per form unit:
		-4438.55	-60389.6	-2516.23			-4409.68	-59996.8	-2499.87				-4409.68	-59996.8	-2499.87			16.3674
		DeltaGf (ev/form unit)					DeltaGf (ev/form unit)						DeltaGf (ev/form unit)
		-9.21804					-9.21804						-9.21804
		MuO2 finnis method):		per form unit			MuO2 finnis method):		per form unit				MuO2 finnis method):		per form unit
				-877.782	-438.891				-861.414	-430.707					-865.073	-432.537
		MuO2 (simulation method):		per form unit			MuO2 (simulation method):		per form unit				MuO2 (simulation method):		per form unit
		-516.231	-7023.69	-877.961	-438.981		-516.231	-7023.69	-877.961	-438.981			-507.108	-6899.56	-862.445	-431.222		15.5161
		muo (Tio2) Opoor:		-887			muo (Tio2) Opoor:		-870.632				muo (Tio2) Opoor:		-874.291
				-443.5					-435.316						-437.146
	calculated DeltagF using PBE Tio2, PBE Ti, PBE O				calculated DeltagF using PBE+U+J Tio2, PBE Ti, PBE O					calculated DeltagF using PBE+U+J Tio2, PBE+U+J Ti, PBE+U+J O
		-9.03888				7.32852				-11.8464
		Actual deltagF (0K)				Actual deltagF (0K)				Actual deltagF (0K)
		-9.74107				-9.74107				-9.74107
		error (eV):				error (eV):				error (eV):
		-0.702184				-17.0696				2.10531
	charge	Edefect	E_defect	E_perf	μ_O	VBM E	form E	Charge correction	form E (VBM)	form E (CBM)
PBE		ryd	eV						0	1.8346	2.7924
ch0	0	-4405.97	-59946.3	-60389.6	-438.891	8.7053	4.42636	0	4.42636	4.42636	4.42636
ch2	2	-4407.52	-59967.4	-60389.6	-438.891	8.7053	0.689267	0	0.689267	4.35847	6.27407
Chg transition:						transition	1.86855		1.86855	-0.0339459
			-19.2791
UJ									0	2.7924
ch0	0	-4377.6	-59560.3	-59996.8	-432.537	7.4236	3.895	0	3.895	3.895
ch2	2	-4379.08	-59580.5	-59996.8	-432.537	7.4236	-1.40491	0	-1.40491	4.17989
Chg transition:				-2499.87		transition			2.64996	0.142441
																			1.85842
																			1.87
																			-0.0115819
							Pure cell PBE			Pure cell UJ
							-16644.6	-226461		-16536.3	-224988
335 size	Final energies
	charge	Edefect	E_defect	E_perf	μ_O	VBM E	form E	Charge correction	form E (VBM)	form E (CBM)
PBE		ryd	eV						0	1.8346	2.7924					28000
ch0	0	-16612	-226018	-226461	-438.891	8.7053	3.98107	0	3.98107	3.98107	3.98107					56
ch2	2	-16613.6	-226039	-226461	-438.891	8.7053	0.26423	0	0.26423	3.93343	5.84903
																1120
Chg transition:						transition	1.85842		1.85842	-0.0238181
			-19.269
UJ									0	2.7924
ch0	0	-16504.3	-224552	-224988	-432.537	7.4236	3.09007	0	3.09007	3.09007			7
ch2	2	-16505.7	-224572	-224988	-432.537	7.4236	-1.61224	0	-1.61224	3.97256			28000	4000	80000
													0.00025
Chg transition:				-9374.49		transition			2.35116	0.441241
					-432.537	7.4236
			PBE
								-16589
						Pure cell PBE			Pure cell UJ
Unit cell size	Final energies					-369.879	-5032.46		-367.473	-4999.73
	charge	Edefect	E_defect	E_perf	μ_O	VBM E	form E	Charge correction	form E (VBM)	form E (CBM)
PBE		ryd	eV						0	1.8346	2.7924
ch0	0	-337.218	-4588.08	-5032.46	-438.891	8.7053	5.48802	0	5.48802	5.48802	5.48802
ch2	2	-338.613	-4607.07	-5032.46	-438.891	8.7053	3.91457	0	3.91457	7.58377	9.49937
Chg transition:						transition	0.786723		0.786723	1.04788
			-18.1973
UJ									0	2.7924
ch0	0	-335.317	-4562.23	-4999.73	-432.537	7.4236	4.96592	0	4.96592	4.96592
ch2	2	-336.683	-4580.81	-4999.73	-432.537	7.4236	1.22881	0	1.22881	6.81361
Chg transition:				-208.322		transition			1.86855	0.923845
							-16536.3	-224988
335 total UJ
Chg transition:						transition	#DIV/0!		#DIV/0!	#DIV/0!
			0
UJ									0	2.7924
ch0	0	-16504.2	-224551	-224988	-432.537	7.4236	3.81681	0	3.81681	3.81681
ch2	2	-16505.7	-224572	-224988	-432.537	7.4236	-1.61398	0	-1.61398	3.97082
Chg transition:				-9374.49		transition			2.71539	0.0770094
		Magnetised				PBE:	Charge	Size	Form E at VBM	Difference	Freysoldt correction	Predicted value
		both were magnetised.					0	223	3.87587		0	3.87587
							0	335	3.98107	0.105196	0	3.98107
							2	223	0.688781		1.49364	2.18242
							2	335	0.26423	-0.424551	0.968072	1.2323
						UJ	Charge	Size	Form E at VBM	Difference	Freysoldt correction	Predicted value
							0	223	3.6407		0	3.6407
							0	335	3.81681	0.176101	0	3.81681
							2	223	-1.40492		2.13587	0.730945
							2	335	-1.61398	-0.209051	1.47658	-0.137396
								-16536.3	-224988
	335 total UJ (No spin polarisation)
	Chg transition:						transition	#DIV/0!		#DIV/0!	#DIV/0!
				0
	UJ									0	2.7924
	ch0	0	-16504.3	-224552	-224988	-432.537	7.4236	3.09007	0	3.09007	3.09007
	ch2	2	-16505.7	-224572	-224988	-432.537	7.4236	-1.61224	0	-1.61224	3.97256
	Chg transition:				-9374.49		transition			2.35116	0.441241
								work/blinux/defect
									For the blobls:
									PBEOvac0truelowthresh
									UJOvac0truelowthresh

## Sheet: ZrO2rawresults
	Pure cell:
								13.6057		PBE		gap
		TIO2								Evbm	10.1862	3.6351
										Ecbm	13.8213
	PBE				UJ
		Total energy (ryd)								UJ
	222k222	-5270.19	-71704.6		222k222	-5224.65	-71085			Evbm	8.3278	gap
										Ecbm	13.8989	5.5711
Ovac 3 fold
	charge	Edefect	E_defect	E_perf	μ_O	VBM E	form E	Charge correction	form E (VBM)	form E (CBM)
PBE		ryd	eV						0	3.6351	5.5711	5.59
ch0	0	-5237.48	-71259.5	-71704.6	-438.429	10.1862	6.62681	0	6.62681	6.62681	6.62681
ch1	1	-5238.44	-71272.6	-71704.6	-438.429	10.1862	3.71948	0	3.71948	7.35458	9.29058
ch2	2	-5239.4	-71285.7	-71704.6	-438.429	10.1862	0.854735	0.345852	1.20059	8.47079	12.3428
Chg transition:							2.88604		0.749064
						2.88604
UJ									0	5.5711
ch0	0	-5192.56	-70648.4	-71085	-429.82	8.3278	6.81767	0	6.81767	6.81767
ch1	1	-5193.51	-70661.3	-71085	-429.82	8.3278	2.21933	0	2.21933	7.79043													222
ch2	2	-5194.46	-70674.3	-71085	-429.82	8.3278	-2.39732	0.354172	-2.04315	9.09905
Chg transition:				-2961.88			4.60749	0.963607	4.43041	1.14069
																							2.88604
				UJ	PBE		2.88604		2.50291		0.749064												2.87757
			UJ3fold	0.354172	0.345852		4.60749		4.2903		0.963607
			UJ4fold	0.344172	0.337852
Ovac 4 fold																							-0.00846907
	charge	Edefect	E_defect	E_perf	μ_O	VBM E	form E	Charge correction	form E (VBM)	form E (CBM)
PBE		ryd	eV						0	3.6351	5.5711
ch0	0	-5237.48	-71259.6	-71704.6	-438.429	10.1862	6.5263	0	6.5263	6.5263	6.5263
ch1	1	-5238.42	-71272.3	-71704.6	-438.429	10.1862	4.04702	0	4.04702	7.68212	9.61812
ch2	2	-5239.35	-71285	-71704.6	-438.429	10.1862	1.52048	0.337852	1.85833	9.12853	13.0005
Chg transition:							2.50291	1.13219		2.33399	1.30111
UJ									0	5.5711
ch0	0	-5192.61	-70649.1	-71085	-429.82	8.3278	6.08068	0	6.08068	6.08068
ch1	1	-5193.54	-70661.7	-71085	-429.82	8.3278	1.84724	0	1.84724	7.41834
ch2	2	-5194.47	-70674.4	-71085	-429.82	8.3278	-2.49993	0.344172	-2.15576	8.98644
Chg transition:				-2961.88			4.2903	1.2808	4.11822	1.45288
											-438.981
										1.13219
							-0.100504			1.2808
							0.327541
				-5238.42			0.665745
Spin polarised?
				4	-427.984		-0.736985									UJ calc
							-0.372089									using crystal reference with no Ti UJ
				3	-428.863		-0.102607
																Ti (crystal) energy :		per form unit:
Ovac 3 fold																	0	0
	charge	Edefect	E_defect	E_perf	μ_O	VBM E	form E	Charge correction	form E (VBM)	form E (CBM)						TiO2 sim:		per form unit:
PBE		ryd	eV						0	0	0	5.59					0	0
ch0	0	-5237.48	-71259.5	-71704.6	-438.429	10.1862	6.65116	0	6.65116	6.65116	6.65116
ch2	2	-5239.35	-71285	-71704.6	-438.429	10.1862	1.52048	0	1.52048	8.79068	12.6627					DeltaGf (ev/form unit)
																-9.21804
Chg transition:							2.56534		-2.56534
																MuO2 finnis method):		per form unit
UJ									0	5.5711
ch0	0	-5192.56	-70648.4	-71085	-429.82	8.3278	6.82869	0	6.82869	6.82869								9.21804	4.60902
ch2	2	-5194.46	-70674.3	-71085	-429.82	8.3278	-2.39826	0	-2.39826	8.74394
																MuO2 (simulation method):		per form unit
Chg transition:				-2961.88			4.61348		-4.61348							-516.231	-7023.69	-877.961	-438.981
Ovac 4 fold
																muo (Tio2) Opoor:		0
	charge	Edefect	E_defect	E_perf	μ_O	VBM E	form E	Charge correction	form E (VBM)	form E (CBM)								0
PBE		ryd	eV						0	3.6351	5.5711
ch0	0	-5237.48	-71259.6	-71704.6	-438.429	10.1862	6.53132	0	6.53132	6.53132	6.53132
ch2	2	-5239.35	-71285	-71704.6	-438.429	10.1862	1.51952	0	1.51952	8.78972	12.6617
Chg transition:							2.5059
UJ									0	5.5711
ch0	0	-5192.61	-70649.1	-71085	-429.82	8.3278	6.08307	0	6.08307	6.08307
ch2	2	-5194.47	-70674.4	-71085	-429.82	8.3278	-2.50088	0	-2.50088	8.64132
Chg transition:				-2961.88			4.29198
											-438.981
										0.354172
				Hubbard_U(1)	1.73633
				Hubbard_J0(1)	0.338074				-0.003
				Hubbard_alpha(1)	0				0.037
				Hubbard_beta(1)	0				0.017
			Othree	Hubbard_U(2)	14.2765		14.865
				Hubbard_J0(2)	2.33872		2.45129
				Hubbard_alpha(2)	0
				Hubbard_beta(2)	0
			Ofour	Hubbard_U(3)	15.4535					Bandgap of zro2 average:
				Hubbard_J0(3)	2.56385
				Hubbard_alpha(3)	0
				Hubbard_beta(3)	0
										13.8151
UJ averaged		AVERAGE O VALUE				-5224.65	-71085			8.1995
								-71085
										5.6156
Ovac 3 fold
	charge	Edefect	E_defect	E_perf	μ_O	VBM E	form E	Charge correction	form E (VBM)	form E (CBM)
		ryd	eV						0	3.6351	5.6156	5.59
ch0	0	-5192.57	-70648.6	-71085	-429.82	8.1995	6.537	0	6.537	6.537	6.537
ch1	1	-5193.52	-70661.5	-71085	-429.82	8.1995	1.86822	0	1.86822	7.43932	7.43932			Mu3fold
ch2	2	-5194.47	-70674.3	-71085	-429.82	8.1995	-2.81126	0.212172	-2.59909	8.54311	8.54311			-504.334	-6861.81
Chg transition:							4.67413		4.56804	1.04756					-428.863
Ovac 4 fold									0	5.6156				mu4fold
ch0	0	-5192.57	-70648.6	-71085	-429.82	8.1995	6.56043	0	6.56043	6.56043				-503.3	-6847.75
ch1	1	-5193.49	-70661.1	-71085	-429.82	8.1995	2.26716	0	2.26716	7.83826					-427.984
ch2	2	-5194.42	-70673.7	-71085	-429.82	8.1995	-2.14434	0.212172	-1.93217	9.21003
Chg transition:				-2961.87			4.35238	-4.35238	4.2463	1.3693				zr average
														-503.817	-6854.78
															-428.424
							0.0234319
							0.398946
							0.666924
UJ, subtracting out the hubbard energies:					3vac
UJ									0	5.5711
ch0	0	-5236.6	-71247.6	-71692.5	-438.429	8.3278	6.50061	0	6.50061	6.50061		444.93	6.50061
ch1	1	-5237.56	-71260.7	-71692.5	-438.429	8.3278	1.69242	0	1.69242	7.26352
ch2	2	-5238.53	-71273.8	-71692.5	-438.429	8.3278	-3.07419	0.212172	-2.86202	8.28018
Chg transition:				-2961.88			4.60749	0.963607	4.50141	1.06969
UJ, subtracting out the hubbard energies:					4vac
UJ									0	5.5711
ch0	0	-5236.61	-71247.7	-71692.5	-438.429	8.3278	6.37617	0	6.37617	6.37617
ch1	1	-5237.54	-71260.4	-71692.5	-438.429	8.3278	2.01105	0	2.01105	7.58215
ch2	2	-5238.48	-71273.1	-71692.5	-438.429	8.3278	-2.4049	0.212172	-2.19273	8.94947
Chg transition:				-2961.88			4.2903	1.2808	4.18422	1.38688
				-444.805
									-71247.6	-71692.5
3vac
		Total energy	hubbard energy (ryd):	hubbard energy (eV)								-516.231
ch0	0	-5192.56	44.0382	599.17	-5236.6					Mu O regular		-32.2645	-438.981
ch1	1	-5193.51	44.0536	599.38	-5237.56
ch2	2	-5194.46	44.0646	599.53	-5238.53					3-fold
		Total energy								4-fold
ch0	0	-5192.61	43.9931	598.557	-5236.61
ch1	1	-5193.54	44.0028	598.689	-5237.54					average
ch2	2	-5194.47	44.0079	598.758	-5238.48
										Hubbard_U(1)	14.2765		14.865
										Hubbard_J0(1)	2.33872		2.45129
	pure?	-5224.65	44.6476	-5269.3	-71692.5
										Hubbard_U(1)	15.4535
										Hubbard_J0(1)	2.56385
	LARGER SUPERCELL 333
														13.6057
									-504.334	11.8355		-6861.82	161.031		10.0644
									-503.3	12.8594		-6847.75	174.962		10.9351
															0.870663
	HIGH SUPERCELLS:
						Perfect cell				13.8151
PBE		PBE				-17786.9	-242003			8.1995
								-71085
										5.6156
Ovac 3 fold
	charge	Edefect	E_defect	E_perf	μ_O	VBM E	form E	Charge correction	form E (VBM)	form E (CBM)
		ryd	eV						0	3.6351	5.6156	5.59
ch0	0	-17754.2	-241558	-242003	-438.429	10.1862	6.60413	0	6.60413	6.60413	6.60413
ch2	2	-17756.1	-241584	-242003	-438.429	10.1862	0.848992	0	0.848992	11.9912	11.9912
Chg transition:							2.87757		2.87757	2.73803
							0.757533
Ovac 4 fold									0	5.6156
ch0	0	-17754.2	-241558	-242003	-438.429	10.1862	6.51446	0	6.51446	6.51446
ch2	2	-17756.1	-241583	-242003	-438.429	10.1862	1.44216	0	1.44216	12.5844
Chg transition:				-10083.5			2.53615	-2.53615	2.53615	3.07945
																2.53615
							-0.0896693
							#REF!
							0.593173
						Perfect cell				13.8151
UJ averaged		AVERAGE O VALUE				-17633.2	-239912			8.1995
								-71085
										5.6156
Ovac 3 fold
	charge	Edefect	E_defect	E_perf	μ_O	VBM E	form E	Charge correction	form E (VBM)	form E (CBM)
		ryd	eV						0	5.6156	5.6156	5.59
ch0	0	-17601.1	-239475	-239912	-429.82	8.1995	6.42134	0	6.42134	6.42134	6.42134
ch2	2	-17603	-239501	-239912	-429.82	8.1995	-3.0136	0	-3.0136	8.2176	8.1286
Chg transition:							4.71747		4.71747	0.898133
Ovac 4 fold									0	5.6156
ch0	0	-17601.1	-239475	-239912	-429.82	8.1995	6.44675	0	6.44675	6.44675
ch2	2	-17603	-239501	-239912	-429.82	8.1995	-2.44714	0	-2.44714	8.78406
Chg transition:				-9996.32			4.44695	-4.44695	4.44695	1.16865
			BOTH ARE 4 fold
								suggested correction		0.212172
				3 fold actuall
				0.31187 0.43972 0.54737
			PBE:
			3fold	Charge	Size	Form E at VBM	Difference	Freysoldt correction	Predicted value
				0	222	6.65116		0	6.65116
				0	333	6.60413	-0.047032	0	6.60413
				2	222	1.52048			1.52048
				2	333	0.848992	-0.671488		0.848992
			4fold	0	222	6.53132		0	6.53132
				0	333	6.51446	-0.0168644	0	6.51446
				2	222	1.51952		2.08907	3.60859
				2	333	1.44216	-0.0773575	1.39261	2.83477
			UJ
			3fold	Charge	Size	Form E at VBM
				0	222	6.537		0	6.537
				0	333	6.42134	-0.11566	0	6.42134
				2	222	-2.59909			-2.59909
				2	333	-3.0136	-0.414506		-3.0136
			4fold	0	222	6.56043		0	6.56043
				0	333	6.44675	-0.113683	0	6.44675
				2	222	-1.93217		2.08907	0.156905
				2	333	-2.44714	-0.514979	1.39261	-1.05453
												somewhere around 0.2 ish
				Charge	Size	Form E at VBM	Difference	Freysoldt correction	Predicted value
			4fold	0	222	6.56043		0	6.56043
				0	333	6.44675	-0.113683	0	6.44675
				2	222	-1.93217		2.08907	0.156905
				2	333	-2.44714	-0.514979	1.39261	-1.05453
				Charge	Size	Form E at VBM	Difference	Freysoldt correction	Predicted value
				0	222	6.53132		0	6.53132
				0	333	6.51446	-0.0168644	0	6.51446
				2	222	1.51952		2.08907	3.60859
				2	333	1.44216	-0.0773575	1.39261	2.83477

## Sheet: HfO2rawresults
							conversion	13.6057
							conversion	13.6057
	PBE 222					-6086.77		-82814.7
	Ovac 3 fold												experimental:
													5.78
		charge	Edefect	E_defect	E_perf	μ_O	VBM E	form E	Charge correction	form E (VBM)	form E (CBM)
			ryd	eV						0	4.204
	ch0	0	-6054.02	-82369.1	-82814.7	-438.981	10.7802	6.63228	0	6.63228	6.63228
		1	-6055.03	-82382.9	-82814.7	-438.981	10.7802	3.62469
	ch2	2	-6056.04	-82396.7	-82814.7	-438.981	10.7802	0.594589	0	0.594589	0.594589			0.46735 0.59056 0.57103
	Chg transition:							3.01884		3.01884	1.18516
								-3.01884
	Ovac 4 fold												0	6.386
	ch0	0	-6054.03	-82369.3	-82814.7	-438.981	10.7802	6.4764	0	6.4764	6.4764			0.72574 0.62245 0.73750
		1	-6055.01	-82382.6	-82814.7	-438.981	10.7802	3.88247
	ch2	2	-6056	-82396.1	-82814.7	-438.981	10.7802	1.19642	0	1.19642	1.19642
	Chg transition:				-3450.61			2.63999	-2.63999	2.63999	1.56401
								-2.63999						4.204		confirmed correct
							-438.981							6.386
												0.378855
										3.01884	2.63999
										1.18516	1.56401
	UJ (unaveraged) 222
						-6034.53		-82104		hubbard							Sumstultius1!		0
										51.4259	-6085.96
	Ovac 3 fold												Hubbard
		charge	Edefect	E_defect	E_perf	μ_O	VBM E	form E	Charge correction	form E (VBM)	form E (CBM)			hubbard subtracted
			ryd	eV						0	6.386
	ch0	0	-6002.5	-81668.2	-82104	-438.981	8.7129	-3.13683	0	-3.13683	-3.13683		50.7166	-6053.22
	ch1	1	-6003.5	-81681.8	-82104	-438.981	8.7129	-8.07125					50.7301	-6054.23
	ch2	2	-6004.51	-81695.6	-82104	-438.981	8.7129	-13.0796	0	-13.0796	-13.0796		50.7407	-6055.25
	Chg transition:							4.97138		4.97138	1.41462
								-4.97138
	Ovac 4 fold									0	6.386
	ch0	0	-6002.58	-81669.3	-82104	-438.981	8.7129	-4.23652	0	-4.23652	-4.23652		50.6485	-6053.23
	ch1	1	-6003.56	-81682.6	-82104	-438.981	8.7129	-8.81377					50.6576	-6054.21		Hubbard_U(1)	1.44094
	ch2	2	-6004.54	-81696	-82104	-438.981	8.7129	-13.5374	0	-13.5374	-13.5374		50.6627	-6055.21		Hubbard_J0(1)	0.323261
	Chg transition:									4.65044	1.73556					Hubbard_alpha(1)	0
																Hubbard_beta(1)	0
					-6003.56							0.320945				Hubbard_U(2)	17.8149
																Hubbard_J0(2)	3.14387
				-6003.56												Hubbard_alpha(2)	0
																Hubbard_beta(2)	0		17.001
										ddd						Hubbard_U(3)	16.1871		2.98632
	UJav 222					-6034.53		-82103.9								Hubbard_J0(3)	2.82876
						-6034.53		-82103.9			6.386
	Ovac 3 fold
		charge	Edefect	E_defect	E_perf	μ_O	VBM E	form E	Charge correction	form E (VBM)	form E (CBM)		-501.713	-6826.15
			ryd	eV						0	3.6351			-426.635		3fold 222 pbe	4fold 222 pbe
	ch0	0	-6002.53	-81668.6	-82103.9	-429.82	8.7129	5.49725	0	5.49725	5.49725					3.01884	2.63999
			-6003.53													1.18516	1.56401				3-fold	4-fold
	ch2	2	-6004.54	-81696	-82103.9	-429.82	8.7129	-4.44131	0	-4.44131	-4.44131									222 PBE	1.18516	1.56401
	Chg transition:							4.96928		4.96928	#REF!									333 PBE	1.18934	1.52364
								1.41672								3fold 222 UJ	4fold 222 UJ			222 UJ	1.41672	1.74037
	Ovac 4 fold									0	5.6156					4.96928	4.64563			333 UJ	1.43511	1.70026
	ch0	0	-6002.54	-81668.7	-82103.9	-429.82	8.7129	5.4463	0	5.4463	5.4463					1.41672	1.74037
			-6003.51
	ch2	2	-6004.5	-81695.4	-82103.9	-429.82	8.7129	-3.84496	0	-3.84496	-3.84496					3fold 333 pbe	4fold 333 PBE
	Chg transition:				-3421			4.64563	-4.64563	4.64563	#REF!					3.01466	2.68036
							below vbm	1.74037								1.18934	1.52364
				Ou (4fold)		OU (3fold)			Oav energie							3fold 333 UJ	4fold 333 UJ
				-426.024		-427.245			-501.713							4.95089	4.68574						PBE
						0			-6826.15							1.43511	1.70026
									-426.635
				-426.635
	PBE 333
					-20542.8	-279500										4fold value on all bandgap:			6.577
																3fold value on all bandgap:
	Ovac 3 fold															average value on all bandgap:			6.4819
																separate values bandgap:			6.386
		charge	Edefect	E_defect	E_perf	μ_O	VBM E	form E	Charge correction	form E (VBM)	form E (CBM)
			ryd	eV						0	3.6351										tick for hfo2
	ch0	0	-20510.1	-279054	-279500	-438.981	10.7802	6.62385	0	6.62385	6.62385
	ch2	2	-20512.1	-279082	-279500	-438.981	10.7802	0.594534	0	0.594534	0.594534
	Chg transition:							3.01466		3.01466	-3.01466					2.63999
								-3.01466								2.68036
	Ovac 4 fold									0	5.6156			change		0.0403726
	ch0	0	-20510.1	-279054	-279500	-438.981	10.7802	6.46695	0	6.46695	6.46695
	ch2	2	-20512.1	-279081	-279500	-438.981	10.7802	1.10623	0	1.10623	1.10623
	Chg transition:				-11645.8			2.68036	-2.68036	2.68036	-2.68036								-20510.1
								-2.68036
				0.511697
				-20510.1				0.156901
	UJav 333						-20366.5
						-20366.5	-277101
	Ovac 3 fold
		charge	Edefect	E_defect	E_perf	μ_O	VBM E	form E	Charge correction	form E (VBM)	form E (CBM)
			ryd	eV						0	3.6351
	ch0	0	-20334.5	-276665	-277101	-429.82	8.7129	5.48969	0	5.48969	5.48969
	ch2	2	-20336.5	-276693	-277101	-429.82	8.7129	-4.4121	0	-4.4121	-4.4121			3.6351
	Chg transition:							4.95089		4.95089	#REF!			5.6156
								1.43511
	Ovac 4 fold									0	5.6156
	ch0	0	-20334.5	-276666	-277101	-429.82	8.7129	5.43615	0	5.43615	5.43615
	ch2	2	-20336.5	-276692	-277101	-429.82	8.7129	-3.93533	0	-3.93533	-3.93533
	Chg transition:				-11545.9			4.68574	-4.68574	4.68574	#REF!
								1.70026
				-0.0535308
													8.7129
													10.7802
								1.60706	21.8651
											Base cell hubbard energy:
										Total U energy of removed 3fold and 4fold
	UJ (unaveraged) 222 with hubbard subtracted									1.48659	20.2262
						-6034.53		-82104			ev
					E hub	51.4259
	Ovac 3 fold				E - Ehub	-6085.96
		charge	Edefect	E_defect	Ehub		E_perf	μ_O	VBM E	form E	Charge correction	form E (VBM)	form E (CBM)
			ryd	eV								0	6.386								eV
	ch0	0	-6002.5	-81668.2	50.7166	-6053.22	-82104	-438.981	8.7129	-3.13683	0	-3.13683	-3.13683						Hubbard:	eV	per O
	ch1	1														16eV O hubb(mol)			13.7344	186.866	11.6791		24.5691
	ch2	2	-6004.51	-81695.6	50.7407	-6055.25	-82104	-438.981	8.7129	-13.0796	0	-13.0796	-13.0796						0.8584
	Chg transition:									4.97138		4.97138	#REF!			18 eV O hubb (mol)			15.1583	206.24	12.89
	Ovac 4 fold											0	6.386								1.21085
	ch0	0	-6002.58	-81669.3	50.6485	-6053.23	-82104	-438.981	8.7129	-4.23652	0	-4.23652	-4.23652
	ch1	1														16eV O (mol)		-502.431	-6835.93	-427.245		13.8002		2.12103
	ch2	2	-6004.54	-81696	50.6627	-6055.21	-82104	-438.981	8.7129	-13.5374	0	-13.5374	-13.5374
	Chg transition:						-3421			4.65044	-4.65044	4.65044	#REF!			18 eV O (mol)		-500.995	-6816.39	-426.024		15.236		2.34604
																no UJ O (mol):		-516.231	-7023.69	-438.981
			3fold	0.709209	9.64928
												sum of def cell and O UJ								-426.635
			4fold	0.777386	10.5769											O molecule (unrelaxed)
												51.575	-0.149192	-2.02986		Standard		-64.5281	-877.95	-438.975
																1.1		-64.4717	-877.182	-438.591	0.389334
																1.2		-64.5281	-877.95	-438.975	0.00537111
														2 eV mismatch		1.22		-64.5304	-877.981	-438.99	-0.00997054
																1.24		-64.5301	-877.977	-438.988	-0.00778124
																1.3		-64.5192	-877.829	-438.915	0.0658346
																nospin1.2		-64.4679	-877.131	-438.566	0.414849
																							1.221
																	nosp	-64.4679	-877.131	-438.566
																	sp	-64.5281	-877.95	-438.975
																			Hubbard:	eV	per O
																16eV O hubb(mol)			13.827	188.126	11.7578		11.7578
																			0.864185
																18 eV O hubb (mol)				0	0
																					-11.7578
																16eV O (mol)		-502.378	-6835.2	-427.2		#REF!		#REF!
																18 eV O (mol)			0	0		#REF!		#REF!
																					1.221

## Sheet: More Raw results
			E (ryd)	EVBM	Transition point				13.6057
										PBE		gap
										Evbm	8.7053	1.8346
										Ecbm	10.5399
						cbm
						1.8346	3.03			UJ
					above VBM	below CBM calc	Below CBM exp			Evbm	7.4236	gap
	Pbe 223k222	Pure	-4438.55	8.7053						Ecbm	10.216	2.7924
		0 true value	-4405.97		1.86879	-0.0341887	1.16121
		0	-4406.01
		1	-4406.74
		2	-4407.52
						2.7924	3.03
					above VBM	below CBM calc	Below CBM exp
	UJ223k222purecell	Pure	-4409.68	7.4236
	size, kpoints, method:	0 lowthresh	-4377.6		2.64996	0.142436	0.380036
	72,222,UJ	0	-4377.62
		0 unrelaxed	-4377.52
		1	-4378.31
Tio2		2	-4379.08
		2 unrelaxed	-4378.86
										0vac0 lowt	-4405.97		-59946.3
										0vac0	-4406.01		-59946.8
	PBE 335 kgam	pure	-16644.6	8.7053			difference
		0	-16612.1		1.85842		-0.0103707
	correct to use	0 lowerthing	-16612						72	atoms
		2	-16613.6						270	atoms
	UJ 335 kgam	pure	-16536.3	7.4236	2.71539		0.065427
	alrighty real.	0	-16504.2								Tio2
		2	-16505.7								above VBM	below CBM calc	Below CBM exp
										PBE	1.86879	-0.0341887	1.16121
										DFT+U+J	2.64996	0.142436	0.380036
						3.13	3.03			GW	2.73711	0.39289	0.29289
		0	5.7938		above VBM	below CBM calc	Below CBM exp
		1	3.29897
		2	0.31958		2.73711	0.39289	0.29289
								PBE		gap
								Evbm	10.1862	3.6351
				13.6057				Ecbm	13.8213
								UJ
								Evbm	8.3278	gap
								Ecbm	13.8989	5.5711
zro2			ryd			3.6351	5.59				0
				VBM	above VBM	below CBM calc	Below CBM exp				0
	2x2x2 PBE	pure	-5270.19	10.1862							0
	3fold	0	-5237.48		2.88604	0.749064	2.70396				0
	3fold	1	-5238.44								0
	3fold	2	-5239.4								0
											0
	4fold	0	-5237.48		2.50291	1.13219	3.08709				0
	4fold	1	-5238.42								0
	4fold	2	-5239.35		2.83578	0.799316	2.75422				0
			0.00738691
			-0.0240738
			-0.0489313			5.5711	5.59
	2x2x2 DFT+U+J				above VBM	below CBM calc	Below CBM exp
	2x2x2 k222	pure	-5224.65	8.3278
	3fold	0	-5192.56	8.3278	4.60749	0.963607	0.982507					above VBM	below CBM calc	Below CBM exp
	3fold	1	-5193.51	8.3278							pbe	2.88604	0.749064	2.70396
	3fold	2	-5194.46	8.3278							DFT+U+J	4.54583	1.02527	1.04417
											HSE	3.89489	1.32511	1.69511
	4fold	0	-5192.61	8.3278	4.2903	1.2808	1.2997
	4fold	1	-5193.54	8.3278
	4fold	2	-5194.47	8.3278	2.3806	3.1905	3.2094
			0.0541674
			0.027348
	2x2x2 dFT+U+J UJ averaged		0.00754147
							go for it
						5.5711	5.59
	2x2x2 DFT+U+J				above VBM	below CBM calc	Below CBM exp
	2x2x2 k222	pure	-5224.65	8.1995
	3fold	0	-5192.57	8.1995	4.54583	1.02527	1.04417
	3fold	1	-5193.52	8.1995
	3fold	2	-5194.47	8.1995
	4fold	0	-5192.57	8.1995	4.22408	1.34702	1.36592
	4fold	1	-5193.49	8.1995
	4fold	2	-5194.42	8.1995
			-0.00172221
			-0.029322
			-0.049018
	3x3x3 PBE
	PBE333kgpure 3x3x3 kgam PBE	pure	-17786.9	10.1862
	3fold	0	-17754.2	10.1862	2.87757			-0.00846907
	3fold	1		10.1862
	3fold	2	-17756.1	10.1862
				10.1862
	4fold	0	-17754.2	10.1862	2.53615			0.0332343
	4fold	1		10.1862
	4fold	2	-17756.1	10.1862
	3x3x3 DFT+U+J averaged
	PBE333kgpure 3x3x3 kgam PBE	pure	-17633.2	8.3278
		0	-17601.1	8.3278	4.58917			-0.0183263
		1		8.3278
		2	-17603	8.3278
				8.3278
		0	-17601.1	8.3278	4.31865			0.028341
		1		8.3278
		2	-17603	8.3278
						5.22	5.59
	Lyons				above VBM	below CBM calc	Below CBM exp
	3fold	0	5.47159
		1	1.30914
		2	-2.31818		3.89489	1.32511	1.69511
		0	5.47159		3.59489	1.62511	1.99511
		1	1.70914
		2	-1.71818							8.7129
										10.7802
	hfo2					4.204	5.78
					above VBM	below CBM calc	Below CBM exp
	2x2x2 PBE	pure	-6086.77	10.7802						exp
	3fold	0	-6054.02	10.7802	3.01884	1.18516	2.76116
	3fold	1	-6055.03	10.7802						5.78
	3fold	2	-6056.04	10.7802
	4fold	0	-6054.03	10.7802	2.63999	1.56401	3.14001
	4fold	1	-6055.01	10.7802
	4fold	2	-6056	10.7802	2.94091	1.26309	2.83909
			0.0114565
			-0.0189465			6.386	5.78
			-0.0442341			6.386	5.78
	2x2x2 DFT+U+J				above VBM	below CBM calc	Below CBM exp
	2x2x2 k222	pure	-6034.53	8.7129
	3fold	0	-6002.5	8.7129	4.97138	1.41462	0.808618
	3fold	1	-6003.5	8.7129
	3fold	2	-6004.51	8.7129
	4fold	0	-6002.58	8.7129	4.65044	1.73556	1.12956
	4fold	1	-6003.56	8.7129
	4fold	2	-6004.54	8.7129
						6.386	5.78
	2x2x2 DFT+U+J hfo2				above VBM	below CBM calc	Below CBM exp
	2x2x2 k222	pure	-6034.53	8.7129							above VBM	below CBM calc	Below CBM exp
	3fold	0	-6002.53	8.7129	4.96928	1.41672	0.810719			pbe	2.94091	1.26309	2.83909
	3fold	1	-6003.53	8.7129						DFT+U+J	4.9438	1.4422	0.836197
	3fold	2	-6004.54	8.7129						HSE	3.88599	1.97401	1.89401
	4fold	0	-6002.54	8.7129	4.64563	1.74037	1.13437
	4fold	1	-6003.51	8.7129
	4fold	2	-6004.5	8.7129	4.9438	1.4422	0.836197
			0.00374513
			-0.0225863
			-0.0438314					4.204
	3x3x3 PBE
	PBE333kgpure 3x3x3 kgam PBE	pure	-20542.8	10.7802
	3fold	0	-20510.1	10.7802	3.01532			-0.00352326
	3fold
	3fold	2	-20512.1	10.7802
	4fold	0	-20510.1	10.7802	2.68032			0.0403311
	4fold
	4fold	2	-20512.1	10.7802
	3x3x3 DFT+U+J averaged
	PBE333kgpure 3x3x3 kgam PBE	pure	-20366.5	8.7129
	3fold	0	-20334.5	8.7129	4.95089			-0.0204881
	3fold
	3fold	2	-20336.5	8.7129
	4fold	0	-20334.5	8.7129	4.68574			0.0353026
	4fold
	4fold	2	-20336.5	8.7129
						5.86	5.78
					above VBM	below CBM calc	Below CBM exp
		0	5.43825
		1	1.29099
		2	-2.33373		3.88599	1.97401	1.89401
		0	5.43825		3.58599	2.27401	2.19401
		1	1.69099
		2	-1.73373

## Sheet: Pure cell results
		Pure cell results:
	TIO2			13.6057
PBE
	Total energy (ryd)
223k222	-4438.55	-60389.6
UJ
223k222	-4409.68	-59996.8
	ZrO2
PBE
	Total energy (ryd)
222k222	-5270.19	-71704.6
UJ
222k222	-5224.65	-71085
	HfO2
PBE
	Total energy (ryd)
222k222	-6086.77	-82814.7
UJ
222k222	-6034.53	-82104

## Sheet: O references
		All of these are the results of dimer simulations for and O2 atom, with U and J applied corresponding to a corresponding atom
													13.6057
				PBE
			0.615	found	in	./dimer0.615/relax.out:	!	Total+Makov-Payne	energy	=	-64.5111	Ry		-438.859
			0.616	found	in	./dimer0.616/relax.out:	!	Total+Makov-Payne	energy	=	-64.5161	Ry		-438.893
			0.617	found	in	./dimer0.617/relax.out:	!	Total+Makov-Payne	energy	=	-64.5202	Ry		-438.921
			0.618	found	in	./dimer0.618/relax.out:	!	Total+Makov-Payne	energy	=	-64.5235	Ry		-438.944
			0.619	found	in	./dimer0.619/relax.out:	!	Total+Makov-Payne	energy	=	-64.5262	Ry		-438.962
			0.62	found	in	./dimer0.620/relax.out:	!	Total+Makov-Payne	energy	=	-64.5281	Ry		-438.975
			0.621	found	in	./dimer0.621/relax.out:	!	Total+Makov-Payne	energy	=	-64.5295	Ry		-438.984
			0.622	found	in	./dimer0.622/relax.out:	!	Total+Makov-Payne	energy	=	-64.5302	Ry		-438.989
		xxx	0.623	found	in	./dimer0.623/relax.out:	!	Total+Makov-Payne	energy	=	-64.5304	Ry		-438.99
			0.624	found	in	./dimer0.624/relax.out:	!	Total+Makov-Payne	energy	=	-64.5301	Ry		-438.988
			0.625	found	in	./dimer0.625/relax.out:	!	Total+Makov-Payne	energy	=	-64.5293	Ry		-438.983
											-64.5304
											-438.99			-438.99
		zo2 UJ values:		3fold														zro2
											3fold							3fold
			0.615	found	in	./dimer0.615/relax.out:	!	Total+Makov-Payne	energy	=	-63.1525	Ry				Zro2		Hubbard_U(2)	14.2765
			0.616	found	in	./dimer0.616/relax.out:	!	Total+Makov-Payne	energy	=	-63.1569	Ry						Hubbard_J0(2)	2.33872
			0.617	found	in	./dimer0.617/relax.out:	!	Total+Makov-Payne	energy	=	-63.1604	Ry
			0.618	found	in	./dimer0.618/relax.out:	!	Total+Makov-Payne	energy	=	-63.1632	Ry						4fold
			0.619	found	in	./dimer0.619/relax.out:	!	Total+Makov-Payne	energy	=	-63.1653	Ry						Hubbard_U(3)	15.4535
			0.62	found	in	./dimer0.620/relax.out:	!	Total+Makov-Payne	energy	=	-63.1667	Ry						Hubbard_J0(3)	2.56385
			0.621	found	in	./dimer0.621/relax.out:	!	Total+Makov-Payne	energy	=	-63.1674	Ry
		xxx	0.622	found	in	./dimer0.622/relax.out:	!	Total+Makov-Payne	energy	=	-63.1676	Ry						av
			0.623	found	in	./dimer0.623/relax.out:	!	Total+Makov-Payne	energy	=	-63.1673	Ry						Hubbard_U(2)	14.865
			0.624	found	in	./dimer0.624/relax.out:	!	Total+Makov-Payne	energy	=	-63.1665	Ry						Hubbard_J0(2)	2.45129
			0.625	found	in	./dimer0.625/relax.out:	!	Total+Makov-Payne	energy	=	-63.1652	Ry
																		3-fold
																hfo2		Hubbard_U(3)	16.1871
											-63.1676							Hubbard_J0(3)	2.82876
											-429.72
		zo2 UJ values:		4fold														4-fold
																		Hubbard_U(2)	17.8149
			0.615	found	in	./dimer0.615/relax.out:	!	Total+Makov-Payne	energy	=	-63.0339	Ry						Hubbard_J0(2)	3.14387
			0.616	found	in	./dimer0.616/relax.out:	!	Total+Makov-Payne	energy	=	-63.0382	Ry
			0.617	found	in	./dimer0.617/relax.out:	!	Total+Makov-Payne	energy	=	-63.0418	Ry						av
			0.618	found	in	./dimer0.618/relax.out:	!	Total+Makov-Payne	energy	=	-63.0446	Ry						Hubbard_U(2)	17.001
			0.619	found	in	./dimer0.619/relax.out:	!	Total+Makov-Payne	energy	=	-63.0466	Ry						Hubbard_J0(2)	2.98632
			0.62	found	in	./dimer0.620/relax.out:	!	Total+Makov-Payne	energy	=	-63.048	Ry
			0.621	found	in	./dimer0.621/relax.out:	!	Total+Makov-Payne	energy	=	-63.0489	Ry				tio2
			0.622	found	in	./dimer0.622/relax.out:	!	Total+Makov-Payne	energy	=	-63.049	Ry
			0.623	found	in	./dimer0.623/relax.out:	!	Total+Makov-Payne	energy	=	-63.0486	Ry						Hubbard_U(2)	11.2405
			0.624	found	in	./dimer0.624/relax.out:	!	Total+Makov-Payne	energy	=	-63.0478	Ry						Hubbard_J0(2)	1.69887
			0.625
											-63.049
											-428.912
		zo2 UJ values:		av
			0.615	found	in	./dimer0.615/relax.out:	!	Total+Makov-Payne	energy	=	-63.0932	Ry
			0.616	found	in	./dimer0.616/relax.out:	!	Total+Makov-Payne	energy	=	-63.0976	Ry
			0.617	found	in	./dimer0.617/relax.out:	!	Total+Makov-Payne	energy	=	-63.1011	Ry
			0.618	found	in	./dimer0.618/relax.out:	!	Total+Makov-Payne	energy	=	-63.1039	Ry
			0.619	found	in	./dimer0.619/relax.out:	!	Total+Makov-Payne	energy	=	-63.1059	Ry
			0.62	found	in	./dimer0.620/relax.out:	!	Total+Makov-Payne	energy	=	-63.1073	Ry
			0.621	found	in	./dimer0.621/relax.out:	!	Total+Makov-Payne	energy	=	-63.1081	Ry
			0.622	found	in	./dimer0.622/relax.out:	!	Total+Makov-Payne	energy	=	-63.1083	Ry
			0.623	found	in	./dimer0.623/relax.out:	!	Total+Makov-Payne	energy	=	-63.108	Ry
			0.624	found	in	./dimer0.624/relax.out:	!	Total+Makov-Payne	energy	=	-63.1071	Ry
			0.625	found	in	./dimer0.625/relax.out:	!	total energy		=		Ry
											-63.1083
											-429.316
				rutile UJ values
			0.615	found	in	./dimer0.615/relax.out:	!	Total+Makov-Payne	energy	=	-63.4714	Ry
			0.616	found	in	./dimer0.616/relax.out:	!	Total+Makov-Payne	energy	=	-63.4757	Ry
			0.617	found	in	./dimer0.617/relax.out:	!	Total+Makov-Payne	energy	=	-63.4792	Ry
			0.618	found	in	./dimer0.618/relax.out:	!	Total+Makov-Payne	energy	=	-63.4819	Ry
			0.619	found	in	./dimer0.619/relax.out:	!	Total+Makov-Payne	energy	=	-63.4839	Ry
			0.62	found	in	./dimer0.620/relax.out:	!	Total+Makov-Payne	energy	=	-63.4852	Ry
			0.621	found	in	./dimer0.621/relax.out:	!	Total+Makov-Payne	energy	=	-63.4859	Ry
		xxx	0.622	found	in	./dimer0.622/relax.out:	!	Total+Makov-Payne	energy	=	-63.4861	Ry
			0.623	found	in	./dimer0.623/relax.out:	!	Total+Makov-Payne	energy	=	-63.4856	Ry
			0.624	found	in	./dimer0.624/relax.out:	!	Total+Makov-Payne	energy	=	-63.4847	Ry
			0.625	found	in	./dimer0.625/relax.out:	!	Total+Makov-Payne	energy	=	-63.4834	Ry
											-63.4861
											-431.886
	totmag: 2
	starting mag: 0.17
			found	in	./dimer0.615/relax.out:	!	Total+Makov-Payne	energy	=	-62.933	Ry
			found	in	./dimer0.616/relax.out:	!	Total+Makov-Payne	energy	=	-62.9375	Ry
			found	in	./dimer0.617/relax.out:	!	Total+Makov-Payne	energy	=	-62.9413	Ry
			found	in	./dimer0.618/relax.out:	!	Total+Makov-Payne	energy	=	-62.9442	Ry
			found	in	./dimer0.619/relax.out:	!	Total+Makov-Payne	energy	=	-62.9465	Ry
			found	in	./dimer0.620/relax.out:	!	Total+Makov-Payne	energy	=	-62.948	Ry
			found	in	./dimer0.621/relax.out:	!	Total+Makov-Payne	energy	=	-62.949	Ry
			found	in	./dimer0.622/relax.out:	!	Total+Makov-Payne	energy	=	-62.9494	Ry
			found	in	./dimer0.623/relax.out:	!	Total+Makov-Payne	energy	=	-62.9492	Ry
			found	in	./dimer0.624/relax.out:	!	Total+Makov-Payne	energy	=	-62.9486	Ry
			found	in	./dimer0.625/relax.out:	!	Total+Makov-Payne	energy	=	-62.9475	Ry
ddd		3fold
			found	in	./dimer0.615/relax.out:	!	Total+Makov-Payne	energy	=	-62.933	Ry
			found	in	./dimer0.616/relax.out:	!	Total+Makov-Payne	energy	=	-62.9375	Ry
			found	in	./dimer0.617/relax.out:	!	Total+Makov-Payne	energy	=	-62.9413	Ry
			found	in	./dimer0.618/relax.out:	!	Total+Makov-Payne	energy	=	-62.9442	Ry
			found	in	./dimer0.619/relax.out:	!	Total+Makov-Payne	energy	=	-62.9465	Ry
			found	in	./dimer0.620/relax.out:	!	Total+Makov-Payne	energy	=	-62.948	Ry
			found	in	./dimer0.621/relax.out:	!	Total+Makov-Payne	energy	=	-62.949	Ry
			found	in	./dimer0.622/relax.out:	!	Total+Makov-Payne	energy	=	-62.9494	Ry
			found	in	./dimer0.623/relax.out:	!	Total+Makov-Payne	energy	=	-62.9492	Ry
			found	in	./dimer0.624/relax.out:	!	Total+Makov-Payne	energy	=	-62.9486	Ry
			found	in	./dimer0.625/relax.out:	!	Total+Makov-Payne	energy	=	-62.9475	Ry
										-62.9494
										-428.235
		4fold
			found	in	./dimer0.615/relax.out:	!	Total+Makov-Payne	energy	=	-62.7682	Ry
			found	in	./dimer0.616/relax.out:	!	Total+Makov-Payne	energy	=	-62.7727	Ry
			found	in	./dimer0.617/relax.out:	!	Total+Makov-Payne	energy	=	-62.7764	Ry
			found	in	./dimer0.618/relax.out:	!	Total+Makov-Payne	energy	=	-62.7794	Ry
			found	in	./dimer0.619/relax.out:	!	Total+Makov-Payne	energy	=	-62.7816	Ry
			found	in	./dimer0.620/relax.out:	!	Total+Makov-Payne	energy	=	-62.7832	Ry
			found	in	./dimer0.621/relax.out:	!	Total+Makov-Payne	energy	=	-62.7841	Ry
			found	in	./dimer0.622/relax.out:	!	Total+Makov-Payne	energy	=	-62.7845	Ry
			found	in	./dimer0.623/relax.out:	!	Total+Makov-Payne	energy	=	-62.7843	Ry
			found	in	./dimer0.624/relax.out:	!	Total+Makov-Payne	energy	=	-62.7837	Ry
			found	in	./dimer0.625/relax.out:	!	Total+Makov-Payne	energy	=	-62.7826	Ry
										-62.7845
										-427.113
		avfold
			found	in	./dimer0.615/relax.out:	!	Total+Makov-Payne	energy	=	-62.8506	Ry
			found	in	./dimer0.616/relax.out:	!	Total+Makov-Payne	energy	=	-62.8551	Ry
			found	in	./dimer0.617/relax.out:	!	Total+Makov-Payne	energy	=	-62.8588	Ry
			found	in	./dimer0.618/relax.out:	!	Total+Makov-Payne	energy	=	-62.8618	Ry
			found	in	./dimer0.619/relax.out:	!	Total+Makov-Payne	energy	=	-62.864	Ry
			found	in	./dimer0.620/relax.out:	!	Total+Makov-Payne	energy	=	-62.8656	Ry
			found	in	./dimer0.621/relax.out:	!	Total+Makov-Payne	energy	=	-62.8665	Ry
			found	in	./dimer0.622/relax.out:	!	Total+Makov-Payne	energy	=	-62.8669	Ry
			found	in	./dimer0.623/relax.out:	!	Total+Makov-Payne	energy	=	-62.8668	Ry
			found	in	./dimer0.624/relax.out:	!	Total+Makov-Payne	energy	=	-62.8661	Ry
			found	in	./dimer0.625/relax.out:	!	Total+Makov-Payne	energy	=	-62.8651	Ry
										-62.8669
										-427.674
			found	in	./dimer0.615/relax.out:	!	Total+Makov-Payne	energy	=	-63.8417	Ry
			found	in	./dimer0.616/relax.out:	!	Total+Makov-Payne	energy	=	-63.8434	Ry
			found	in	./dimer0.617/relax.out:	!	Total+Makov-Payne	energy	=	-63.8443	Ry
			found	in	./dimer0.618/relax.out:	!	Total+Makov-Payne	energy	=	-63.8443	Ry
			found	in	./dimer0.619/relax.out:	!	Total+Makov-Payne	energy	=	-63.8436	Ry
			found	in	./dimer0.620/relax.out:	!	Total+Makov-Payne	energy	=	-63.8423	Ry
			found	in	./dimer0.621/relax.out:	!	Total+Makov-Payne	energy	=	-63.8403	Ry
			found	in	./dimer0.622/relax.out:	!	Total+Makov-Payne	energy	=	-63.8378	Ry
			found	in	./dimer0.623/relax.out:	!	Total+Makov-Payne	energy	=	-63.8347	Ry
			found	in	./dimer0.624/relax.out:	!	Total+Makov-Payne	energy	=	-63.8312	Ry
			found	in	./dimer0.625/relax.out:	!	Total+Makov-Payne	energy	=	-63.8272	Ry
										-63.8443
										-434.323

## Sheet: summary graphs
		TiO2
		ZrO2
		HfO2
						o1: 3-fold	o2: 4-fold
		Material	U (metal)	J(metal)	U(O1)	J(O1)	U(O2)	J(O2)	PBE bandgap	DFT+U+J bandgap	Experimental bandgap
		TiO2	3.23632	0.383968	11.2405	1.69887	n/a	n/a	1.8346	2.7924	3.03
		ZrO2	1.73633	0.338074	14.2765	2.33872	15.4535	2.56385	3.6351	5.5654	5.59
		HfO2	1.44094	0.323261	16.1871	2.82876	17.8149	3.14387	4.2038	6.3865	5.78
														U	J
													Ti (tio2)	3.23632	0.383968	8.42863
		Material	PBE bandgap	DFT+U+J bandgap	Experimental bandgap								O (tio2)	11.2405	1.69887	6.61647
		TiO2	1.8346	2.7924	3.03								Zr (zro2)	1.73633	0.338074	5.13595
		ZrO2	3.6351	5.5654	5.59								O3fold (zro2)	14.2765	2.33872	6.10442
		HfO2	4.2038	6.3865	5.78								O4fold (zro2)	15.4535	2.56385	6.02745
													Hf (hfo2)	1.44094	0.323261	4.45752
													O4fold (hfo2)	17.8149	3.14387	5.66654
													O3fold (hfO2)	16.1871	2.82876	5.72232
													Cu (Cu2O)	12.476	1.9535	6.38647
													O (Cu2O)	20.4071	3.19064	6.39592
													Zn (znO)	83.1936	15.1126	5.5049
													o (znO)	19.3635	3.70203	5.2305
											simulation	Direct gamma bandgap	indirect band gap
											Experimental (according to lyons)		5.1-6.0
											Experimental (IPS)		5.78
											HSE06 average		5.693
											PBE0 average		6.50867
											G0W0 average		5.7725
											GW0 average		6.055
											No U, No J	4.7093	4.2038
											U on Hf	4.777	4.3184
											U on Hf, U on O	9.5286	9.1487
											U-J method	8.5918	8.1983
											U+J on Hf, U+J on O	6.782	6.3865
							6.3865
											Simulation	Direct gamma bandgap	indirect band gap
											Experimental (according to lyons)		5.0-5.8
											exp(IPS)		5.59
											HSE06 average		5.0975
											PBE0 average		6.18
											GW0 average		5.6
											No U, No J	4.0374	3.6351
											U on Zr	4.1329	3.7919
											U on Zr, U on O	7.9389	7.7263
											U-J method	7.1807	6.9372
											U+J on Zr, U+J on O	5.8343	5.5711
											U on Zr, U on O (old)	7.832	7.625
											U+J on Zr, U+J on O (old)	5.8295	5.5654
												Bandgap
											Exp	3.03
											HSE06 average	3.27333
											PBE0 average	3.94
											G0W0 average	3.4
											No U or J	1.8346
											Ti U	2.0408
											Ti U and O U	3.8274
											U-J method	3.4253
											Ti U+J and O U+J	2.7924

## Sheet: papertables
		Material	PBE bandgap	DFT+U+J bandgap	Averaged O bandgap	Experimental bandgap
		TiO2	1.83	2.79	N/a	3.03
		ZrO2	3.64	5.57	5.61	5.59
		HfO2	4.2	6.39	6.48	5.78
		Zro2:
			above VBM	below calculated CBM	Below Experimental CBM
		PBE	2.89	0.75	2.7
		DFT+U+J (averaging method)	4.55	1.03	1.04
		HSE [29]	3.89	1.33	1.7
		zro2				5.59
				Transition levels:
		Method	Band gap (eV)	Above VBM	Below calculated CBM	Below Experimental CBM
		PBE (3-fold)	3.64	2.83579	0.804214	2.75421		0.779062
		Naïve DFT+U+J (4-fold)	5.57	4.2903	1.2797	1.2997		0.770252
		Subtraction method (3-fold)	5.57	4.72519	0.844813	0.864813		0.848328
		Differing potential method (3-fold)	5.57	4.60749	0.962509	0.982509		0.827198
		Averaging method (3-fold)	5.57	4.67413	0.89587	0.91587		0.839162
		HSE [29] (3-fold)	5.22	3.87309	1.34691	1.71691		0.74197
						5.78
				-1.0373	-0.542701	1.0373
			!	0.417216	-0.0672159	-0.417216
				0.852102	-0.502102	-0.852102
			!	0.734406	-0.384406	-0.734406
				0.801045	-0.451045	-0.801045
				0	0	0
									x points	y points
									-0.009416195856873921,	1.84422
									2.5800376647834264,	1.80402
							!		5.800376647834275,	-4.58794
		hfo2
				Transition levels:
			Band gap (eV)	Above VBM	Below calculated CBM	Below Experimental CBM
		PBE	4.2	2.94	1.26	2.84		0.7
		Naïve DFT+U+J	6.39	4.65043	1.73957	1.12957		0.727767
		Subtraction method	6.39	5.04902	1.34098	0.730981		0.790144
		Differing potential method	6.39	4.97138	1.41862	0.808622		0.777993
		Averaging method	6.39	4.94381	1.44619	0.836194		0.773679
		HSE [29]	5.8	4.12658	1.67342	1.65342		0.71148
				-1.18658	-0.413418	1.18658
			!	0.523851	0.0661493	-0.523851
				0.922436	-0.332436	-0.922436
				0.844795	-0.254795	-0.844795
				0.817224	-0.227224	-0.817224
				0	0	0
					2.64398
		tio2		1.86854		3.03
				Transition levels:
			Band gap (eV)	Above VBM	Below calculated CBM	Below Experimental CBM
		PBE	1.83	1.86854	-0.0385396	1.16146		1.02106
		DFT+U+J	2.79	2.64398	0.14602	0.38602		0.947663
		GW	3.13	2.73711	0.39289	0.29289		0.874476

## Sheet: papertablepreparation
		Material	PBE bandgap	DFT+U+J bandgap	Averaged O bandgap	Experimental bandgap
		TiO2	1.83	2.79	N/a	3.03
		ZrO2	3.64	5.57	5.61	5.59
		HfO2	4.2	6.39	6.48	5.78
		Zro2:
			above VBM	below calculated CBM	Below Experimental CBM
		PBE	2.89	0.75	2.7		transition 3-fold 3.873085339
		DFT+U+J (averaging method)	4.55	1.03	1.04		transition 4-fold 3.573085339
		HSE [29]	3.89	1.33	1.7
		4.60749		4.78741		transition 3-fold 4.1265822785
		4.2903		4.39054		transition 4-fold 3.8265822785
		4.67413		4.2903
		4.35238
										sameeee
		zro2				5.59
				Transition levels:
		Method	Band gap (eV)	Above VBM	Below calculated CBM	Below Experimental CBM
		PBE (3-fold)	3.64	2.88604	0.753961	2.70396		0.792868
		Naïve DFT+U+J (3-fold)	5.57	4.60749	0.962509	0.982509		0.770252
		Subtraction method (3-fold)	5.57	4.78741	0.782594	0.802594		0.859498
		Differing potential method (3-fold)	5.57	4.60749	0.962509	0.982509		0.827198
		Averaging method (3-fold)	5.57	4.67413	0.89587	0.91587		0.839162
		HSE [29] (3-fold)	5.22	3.87309	1.34691	1.71691		0.74197
		PBE (4-fold)	3.64	2.50291	1.13709	3.08709
		Naïve DFT+U+J (4-fold)	5.57	4.2903	1.2797	1.2997
		Subtraction method (4-fold)	5.57	4.39054	1.17946	1.19946
		Differing potential method (4-fold)	5.57	4.2903	1.2797	1.2997
		Averaging method (4-fold)	5.57	4.35238	1.21762	1.23762
		HSE [29] (4-fold)	5.22	3.57309	1.64691	2.01691
						5.78
		PBE (4-fold)
				-0.987046	-0.592954	0.987046
			!	0.417216	-0.0672159	-0.417216
	4.96928			0.914321	-0.564321	-0.914321
	4.64562		!	0.734406	-0.384406	-0.734406
				0.801045	-0.451045	-0.801045
		3.01884	5.13507	0	0	0
		2.63999	4.74728
		4.97138	4.97138						x points	y points
		4.65043	4.65043						-0.009416195856873921,	1.84422
									2.5800376647834264,	1.80402
							!		5.800376647834275,	-4.58794
		hfo2
				Transition levels:
			Band gap (eV)	Above VBM	Below calculated CBM	Below Experimental CBM
		PBE (3-fold)	4.2	3.01884	1.18116	2.76116		0.718772
		Naïve DFT+U+J (3-fold)	6.39	4.97138	1.41862	0.808622		0.777993
		Subtraction method (3-fold)	6.39	5.13507	1.25493	0.644932		0.80361
		Differing potential method (3-fold)	6.39	4.97138	1.41862	0.808622		0.777993
		Averaging method (3-fold)	6.39	4.96928	1.42072	0.810718		0.777665
		HSE [29] (3-fold)	5.8	4.12658	1.67342	1.65342		0.71148
		PBE (4-fold)	4.2	2.63999	1.56001	3.14001
		Naïve DFT+U+J (4-fold)	6.39	4.65043	1.73957	1.12957
		Subtraction method (4-fold)	6.39	4.74728	1.64272	1.03272
		Differing potential method (4-fold)	6.39	4.65043	1.73957	1.12957
		Averaging method (4-fold)	6.39	4.64562	1.74438	1.13438
		HSE [29] (4-fold)	5.8	3.82658	1.97342	1.95342
				-1.10774	-0.492261	1.10774
			!	0.844795	-0.254795	-0.844795
				1.00849	-0.418486	-1.00849
				0.844795	-0.254795	-0.844795
				0.8427	-0.2527	-0.8427
				0	0	0
					2.64398
		tio2		1.86854		3.03
				Transition levels:
			Band gap (eV)	Above VBM	Below calculated CBM	Below Experimental CBM
		PBE	1.83	1.86854	-0.0385396	1.16146		1.02106
		DFT+U+J	2.79	2.64398	0.14602	0.38602		0.947663
		GW	3.13	2.73711	0.39289	0.29289		0.874476
